# Supplementary material for: Improved reuse and storage performances at room temperature of a new environmentally friendly lactate oxidase biosensor prepared by ambient electrospray immobilization
Source: Royal Society of Chemistry journal article supplement (doi:10.1039/d3gc00494e), 2023-01-01
Supplement: d3gc00494e1.pdf [file d3gc00494e1.pdf]

## Supporting Information

### Improved reuse and storage performances at room temperature of a new environmental-friendly lactate oxidase biosensor made by ambient electro spray immobilization

M. C. Castrovilli\*<sup>a</sup>, V. Scognamiglio<sup>b</sup>, E. Tempesta<sup>c</sup>, J. Chiarinelli<sup>a</sup>, M. Parracino<sup>a</sup>, V. Frisulli<sup>b</sup>, M.T. Giardi<sup>b,d</sup>, L. Avaldi<sup>a</sup>, D. Rossi<sup>c</sup> and A. Cartoni<sup>e</sup>

<sup>a</sup> Istituto di Struttura della Materia-CNR, (ISM-CNR), Area della Ricerca di Roma 1, 00015, Monterotondo, Italy

<sup>b</sup> Institute of Crystallography, National Research Council (CNR-IC), Area della Ricerca di Roma 1, Via Salaria km 29.300, 00015, Monterotondo, Italy

<sup>c</sup> CNR-Institute of Environmental Geology and Geoengineering (CNR-IGAG), Area della Ricerca Roma1, Via Salaria km 29.300, 00015, Monterotondo, Italy

<sup>d</sup> Biosensor Srl, Via Degli Olmetti 4, 00060, Formello, Rome, Italy

<sup>e</sup> Department of Chemistry, Sapienza University, P.le Aldo Moro 5, 00185 Roma, Italy

#### 1. Quantification of LOX immobilized during the ESD process

The amount of deposited enzyme has been evaluated by substituting the screen printed electrode (SPE) with the resonator of a quartz crystal microbalance (QCM). The custom QCM is composed of two gold electrodes with a diameter of 6 mm obtained by vapor deposition on a quartz crystal disk of 14 mm diameter [1,2] and a resonance frequency  $f_0 = 10$  MHz. The resonance frequency variation is proportional to the amount of deposited material [3]. It also depends on the viscoelastic properties of the deposited material, the adhesion on the gold material, and among different layers. As such, the response frequency versus mass had to be calibrated specifically for LOX.

To calibrate the QCM response, controlled amounts of LOX were deposited by drop-casting on the resonator. The range of units considered goes from 0.18 to 2.43 U and the linear fit obtained is reported in Fig. S1. Then the QCM has been used to measure the amount of the LOX deposited during the ESD process, by performing three depositions at the standard condition: by spraying the working LOX solution (1  $\mu\text{g}/\mu\text{L}$ ) at a flow rate of 1  $\mu\text{l}/\text{min}$ , for 40 minutes on the QCM. The average frequency value obtained was interpolated on the calibration line, revealing a quantity of LOX deposited equal to  $2.24 \pm 0.2$  U.

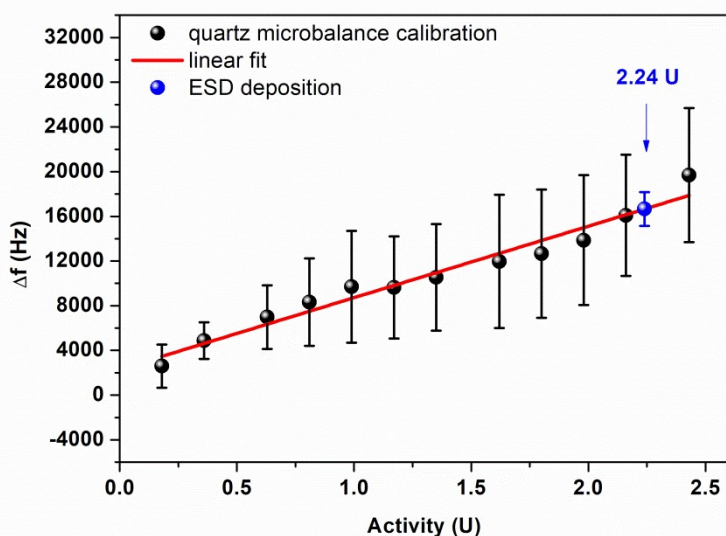

Fig. S1. Calibration curve of the amount of deposited LOX on the QCM electrode by drop-casting (black dots). The blue dot indicates the amount of LOX deposited on QCM during the ESD process. The red line is the linear regression fit ( $y = 6405.56 (\pm 410.38) x + 2312.55 (\pm 601.05)$ ), with an  $R^2 = 0.96$ ). The voltage settings and geometrical parameters for the deposition are the ones in Figure 1 in the main text.

## 2. Cyclic Voltammetry

In order to assess the correct working potential, the electrochemical characterization through cyclic voltammetry (CV) was assessed prior to conducting the chronoamperometric measurements. Fig. S2 presents CV sweeps carried out at 100 mV/s between 0.5V and -0.5 V. The measurements were performed by dropping 100  $\mu$ l of PBS buffer 0.1 M pH7 on PB/C-SPEs and recording the current in the presence of only buffer (red curve) and 0.46 mM of L-Lactic acid (blue curve). These curves are compared with the CV performed on e-LOX/PB/C-SPE in the presence of 0.46 mM L-Lactic acid (black curve).

The reduction peak of Prussian Blue (PB) in Prussian White (PW) and the oxidation peak of PW in PB are shown at -0.1V and 0.26 V respectively on the black curve. The potential of -0.1V has been chosen for the subsequent chronoamperometric measurements.

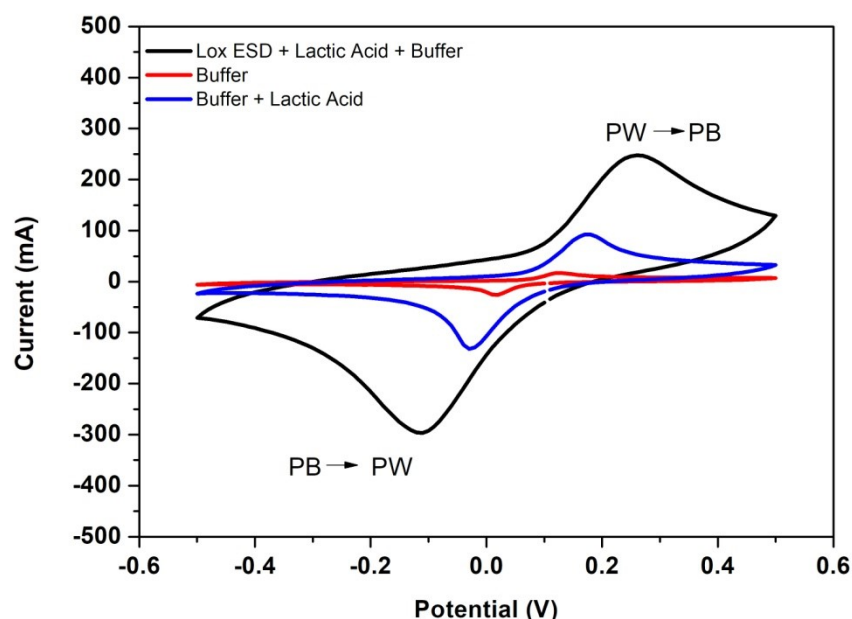

Fig. S2 CV sweeps performed at 100 mV/s between 0.5V and -0.5 V on bare PB/C-SPEs in the presence of 100  $\mu$ l of PBS buffer 0.1 M pH7 (red curve) and 0.46 mM of L-Lactic acid (blue curve). CV sweep performed at the same condition on e-LOX/PB/C-SPE in presence of 0.46 mM of L-Lactic acid diluted in 100  $\mu$ l of buffer (black curve).

## 2. Comparison of Hazardous Chemicals

In Table S1, all the main hazardous chemicals, used for the manufacturing of the biosensors listed in Table 2 of the main article, are shown. The most dangerous chemical for the environment are marked in red. They have been identified according to the Regulation (EC) No 1272/2008 and the GHS Classification<sup>4</sup> as well as the nomenclature, for some of them, identified by the CHEM21 selection guide.<sup>5</sup> As can be seen, all the biosensors mentioned in Table 2 use a large number of chemical agents that are dangerous for both human and environment. The present work demonstrates a greener approach thanks to the use of only isopropanol and water for the ESD spray solution and Prussian Blue for the sensor surface. Isopropanol is recommended by the CHEM21 selection guide and Prussian Blue has not been considered hazardous by the Regulation (EC) No 1272/2008.

Table S1. List of the main hazardous chemicals used for the manufacturing of the biosensors listed in Table 2 of the main article.

| Hazardous Chemical          | Hazards identification according to Regulation (EC) No 1272/2008                                                                                                                                                  | Hazards identification according to GHS Classification <sup>4</sup>                                                                                                                 | CHEM21 selection guide <sup>5</sup> | ref | Present work |
|-----------------------------|-------------------------------------------------------------------------------------------------------------------------------------------------------------------------------------------------------------------|-------------------------------------------------------------------------------------------------------------------------------------------------------------------------------------|-------------------------------------|-----|--------------|
| Triphenylmethane isocyanate | -                                                                                                                                                                                                                 | H319 Causes serious eye irritation (Category 2)<br>H315 Causes skin irritation (Category 2)<br>H334 Skin sensitization (Category 1)<br>H332 Acute toxicity, Inhalation (Category 4) | -                                   | 6   | Absent       |
| Dimethylsulfoxide           | -                                                                                                                                                                                                                 | H315 Causes skin irritation<br>H319 Causes serious eye irritation<br>H335 May cause respiratory irritation                                                                          | Problematic (after discussion)      | 6   | Absent       |
| Potassium ferricyanide      | H319 Causes serious eye irritation (Category 2).<br>H411 Long-term (chronic) aquatic hazard (Category 2). Toxic to aquatic life with long lasting effects.<br>E0H032 Contact with acids liberates very toxic gas. |                                                                                                                                                                                     |                                     | 6,7 | Absent       |
| Hexachloroplatinic acid     | H290 Corrosive to Metals (Category 1).<br>H300 Fatal if swallowed.<br>H301 Acute toxicity, Oral (Category 3).<br>H314, Skin corrosion (Category 1), Toxic if                                                      |                                                                                                                                                                                     | -                                   | 6   | Absent       |

|                                        |                                                                                                                                                                                                                                                                                                                                                                                                                                                                                                                                                                                                                                                                |  |             |        |        |
|----------------------------------------|----------------------------------------------------------------------------------------------------------------------------------------------------------------------------------------------------------------------------------------------------------------------------------------------------------------------------------------------------------------------------------------------------------------------------------------------------------------------------------------------------------------------------------------------------------------------------------------------------------------------------------------------------------------|--|-------------|--------|--------|
|                                        | <p>swallowed</p> <p><b>H317</b> Skin sensitization (Category 1), Causes severe skin burns and eye damage.</p> <p><b>H318</b> Serious eye damage (Category 1), May cause an allergic skin reaction.</p> <p><b>H334</b> Respiratory sensitization (Category 1).</p> <p><b>H372</b> May cause allergy or asthma symptoms or breathing difficulties if inhaled.</p> <p><b>H373</b> Specific target organ toxicity - repeated exposure (Category 2), Kidney.</p> <p><b>H400</b> May be corrosive to metals.</p> <p><b>H410</b> Fatal if swallowed.</p> <p><b>H411</b> Causes severe skin burns and eye damage, Long-term (chronic) aquatic hazard (Category 2).</p> |  |             |        |        |
| <b>Tetrabutylammonium bromide</b>      | <p><b>H302</b> Acute toxicity, Oral (Category 4).</p> <p><b>H315</b> Skin irritation (Category 2).</p> <p><b>H319</b> Eye irritation (Category 2).</p> <p><b>H361fd</b> Reproductive toxicity (Category 2). Suspected of damaging fertility. Suspected of damaging the unborn child.</p> <p><b>H412</b> Long-term (chronic) aquatic hazard (Category 3).</p>                                                                                                                                                                                                                                                                                                   |  | -           | 8      | Absent |
| <b>4-Acetamidophenol</b>               | <b>H302</b> Acute toxicity, Oral (Category 4)                                                                                                                                                                                                                                                                                                                                                                                                                                                                                                                                                                                                                  |  | -           | 8      | Absent |
| <b>Ferrocene</b>                       | <p><b>H228</b> Flammable solids (Category 1).</p> <p><b>H302</b> Acute toxicity, Oral (Category 4).</p> <p><b>H332</b> Acute toxicity, Inhalation (Category 4).</p> <p><b>H360FD</b> Reproductive toxicity (Category 1B).</p> <p><b>H373</b> Specific target organ toxicity - repeated exposure, Inhalation (Category 2), Liver.</p> <p><b>H410</b> Long-term (chronic) aquatic hazard (Category 1).</p>                                                                                                                                                                                                                                                       |  | -           | 8      | Absent |
| <b>Nafion™ 117 containing solution</b> | <p><b>H225</b> Flammable liquids (Category 2).</p> <p><b>H318</b> Serious eye damage (Category 1).</p> <p><b>H336</b> Specific target organ toxicity - single exposure (Category 3), Central nervous system. May cause drowsiness or dizziness.</p> <p><b>H225</b> Highly flammable liquid and vapor.</p> <p><b>H315</b> Causes skin irritation.</p> <p><b>H319</b> Causes serious eye irritation.</p> <p><b>H335</b> May cause respiratory irritation.</p>                                                                                                                                                                                                    |  | -           | 8,9,10 | Absent |
| <b>m-xylene</b>                        | <p><b>H226</b> Flammable liquids (Category 3).</p> <p><b>H332</b> Acute toxicity, Inhalation (Category 4).</p> <p><b>H312</b> Acute toxicity, Dermal (Category 4).</p> <p><b>H315</b> Skin irritation (Category 2).</p> <p><b>H319</b> Eye irritation (Category 2).</p> <p><b>H335</b> Specific target organ toxicity - single exposure (Category 3), Respiratory system .</p> <p><b>H304</b> Aspiration hazard (Category 1).</p> <p><b>H412</b> Long-term (chronic) aquatic hazard (Category 3).</p>                                                                                                                                                          |  | Problematic | 8      | Absent |
| <b>Pyridine</b>                        | <p><b>H225</b> Flammable liquids (Category 2).</p> <p><b>H302</b> Acute toxicity, Oral (Category 4).</p> <p><b>H332</b> Acute toxicity, Inhalation (Category 4).</p> <p><b>H312</b> Acute toxicity, Dermal (Category 4).</p> <p><b>H315</b> Skin irritation (Category 2).</p> <p><b>H319</b> Eye irritation (Category 2).</p>                                                                                                                                                                                                                                                                                                                                  |  | Hazardous   | 8      | Absent |
| <b>Argon gas</b>                       | <b>H280</b> gas under pressure; may explode if heated.                                                                                                                                                                                                                                                                                                                                                                                                                                                                                                                                                                                                         |  | -           | 8      | Absent |
| <b>Hydrogen gas</b>                    | <p><b>H220</b> Extremely flammable gas.</p> <p><b>H280</b> gas under pressure; may explode if heated.</p>                                                                                                                                                                                                                                                                                                                                                                                                                                                                                                                                                      |  | -           | 8      | Absent |
| <b>Ammonia gas</b>                     | <p><b>EUH071</b> Corrosive to the respiratory tract.</p> <p><b>H221</b> Flammable gas (Category 2).</p> <p><b>H280</b> Contains gas under pressure; may explode if heated.</p> <p><b>H314</b> Skin corrosion (Sub-category 1B). Causes severe skin burns and eye damage.</p> <p><b>H318</b> Causes serious eye damage (Category 1).</p>                                                                                                                                                                                                                                                                                                                        |  | -           | 8      | Absent |

|                                           |                                                                                                                                                                                                                                                                                                                                                                                                                                                                                                                                                                                                                                                                                                                                                                                              |                                                                                                                                                                                                                                     |             |          |        |
|-------------------------------------------|----------------------------------------------------------------------------------------------------------------------------------------------------------------------------------------------------------------------------------------------------------------------------------------------------------------------------------------------------------------------------------------------------------------------------------------------------------------------------------------------------------------------------------------------------------------------------------------------------------------------------------------------------------------------------------------------------------------------------------------------------------------------------------------------|-------------------------------------------------------------------------------------------------------------------------------------------------------------------------------------------------------------------------------------|-------------|----------|--------|
|                                           | <p><b>H331</b> Acute toxicity, Inhalation (Category 3).<br/> <b>H400</b> Contains gas under pressure; may explode if heated. Short-term (acute) aquatic hazard (Category 1).<br/> <b>H410</b> Causes severe skin burns and eye damage.<br/> <b>H411</b> Long-term (chronic) aquatic hazard (Category 2). Toxic if inhaled.</p>                                                                                                                                                                                                                                                                                                                                                                                                                                                               |                                                                                                                                                                                                                                     |             |          |        |
| <b>Ethanol</b>                            | <p><b>H225</b> Flammable liquids (Category 2).<br/> <b>H319</b> Eye irritation (Category 2).</p>                                                                                                                                                                                                                                                                                                                                                                                                                                                                                                                                                                                                                                                                                             |                                                                                                                                                                                                                                     | Recommended | 8, 9, 10 | Absent |
| <b>Sulfuric acid</b>                      | <p><b>H290</b> Corrosive to Metals (Category 1),<br/> <b>H314</b> Skin corrosion (Sub-category 1A),<br/> <b>H318</b> Serious eye damage (Category 1),</p>                                                                                                                                                                                                                                                                                                                                                                                                                                                                                                                                                                                                                                    |                                                                                                                                                                                                                                     | -           | 9        | Absent |
| <b>Potassium hydroxide</b>                | <p><b>H290</b> Corrosive to Metals (Category 1).<br/> <b>H302</b> Acute toxicity, Oral (Category 4).<br/> <b>H314</b> Skin corrosion (Sub-category 1A).<br/> <b>H318</b> Serious eye damage (Category 1). Harmful if swallowed.<br/> <b>H319</b> Causes severe skin burns and eye damage.</p>                                                                                                                                                                                                                                                                                                                                                                                                                                                                                                |                                                                                                                                                                                                                                     | -           | 9        | Absent |
| <b>Glutaraldehyde solution</b>            | <p><b>H302</b> Acute toxicity, Oral (Category 4),<br/> <b>H331</b> Acute toxicity, Inhalation (Category 3),<br/> <b>H314</b> Skin corrosion (Sub-category 1B),<br/> <b>H318</b> Serious eye damage (Category 1),<br/> <b>H334</b> Respiratory sensitization (Category 1),<br/> <b>H317</b> Skin sensitization (Category 1),<br/> <b>H335</b> Specific target organ toxicity - single exposure (Category 3), Respiratory system. Very toxic to aquatic life with long lasting effects.<br/> <b>H400</b> Short-term (acute) aquatic hazard (Category 1),<br/> <b>H411</b> Long-term (chronic) aquatic hazard (Category 2). Fatal if inhaled.<br/> <b>EUH071</b> Corrosive to the respiratory tract.<br/> <b>H225</b> Highly flammable liquid and vapor.<br/> <b>H330</b> Fatal if inhaled.</p> |                                                                                                                                                                                                                                     |             | 9        | Absent |
| <b>Dococyltrimethylamm onium chloride</b> | -                                                                                                                                                                                                                                                                                                                                                                                                                                                                                                                                                                                                                                                                                                                                                                                            | <p><b>H302</b> Harmful if swallowed<br/> <b>H312</b> Harmful in contact with skin<br/> <b>H314</b> Causes severe skin burns and eye damage</p>                                                                                      | -           | 10       | Absent |
| <b>Sodium silicate</b>                    | <p><b>H290</b> Corrosive to Metals (Category 1).<br/> <b>H314</b> Skin corrosion (Category 1).<br/> <b>H318</b> Serious eye damage (Category 1).<br/> <b>H335</b> Specific target organ toxicity - single exposure (Category 3), Respiratory system.</p>                                                                                                                                                                                                                                                                                                                                                                                                                                                                                                                                     |                                                                                                                                                                                                                                     | -           | 10       | Absent |
| <b>Tetraethyl orthosilicate</b>           | <p><b>H226</b> Flammable liquids (Category 3).<br/> <b>H332</b> Acute toxicity, Inhalation (Category 4).<br/> <b>H319</b> Eye irritation (Category 2).<br/> <b>H335</b> Specific target organ toxicity - single exposure (Category 3), Respiratory system.</p>                                                                                                                                                                                                                                                                                                                                                                                                                                                                                                                               |                                                                                                                                                                                                                                     | -           | 10       | Absent |
| <b>Cobalt phthalocyanine</b>              | <p><b>H351</b> Carcinogenicity (Category 2).</p>                                                                                                                                                                                                                                                                                                                                                                                                                                                                                                                                                                                                                                                                                                                                             |                                                                                                                                                                                                                                     | -           | 10       | Absent |
| <b>Adipoyl dihydrazide</b>                | -                                                                                                                                                                                                                                                                                                                                                                                                                                                                                                                                                                                                                                                                                                                                                                                            | <p><b>H320</b> Causes eye irritation.<br/> <b>H361</b> Suspected of damaging fertility or the unborn child.<br/> <b>H400</b> Very toxic to aquatic life.<br/> <b>H410</b> Very toxic to aquatic life with long lasting effects.</p> | -           | 10       | Absent |
| <b>Hydrochloric acid</b>                  | <p><b>H290</b> Corrosive to Metals (Category 1).<br/> <b>H314</b> Skin corrosion (Sub-category 1B).<br/> <b>H318</b> Serious eye damage (Category 1).<br/> <b>H335</b> Specific target organ toxicity - single exposure (Category 3), Respiratory system.<br/> <b>H319</b> Causes serious eye damage.</p>                                                                                                                                                                                                                                                                                                                                                                                                                                                                                    |                                                                                                                                                                                                                                     | -           | 10       | Absent |
| <b>Ammonia solution 25%</b>               | <p><b>H314</b> Skin corrosion (Sub-category 1B).<br/> <b>H318</b> Serious eye damage (Category 1).<br/> <b>H335</b> Specific target organ toxicity - single exposure (Category 3), Respiratory system.<br/> <b>H400</b> Short-term (acute) aquatic hazard (Category 1).</p>                                                                                                                                                                                                                                                                                                                                                                                                                                                                                                                  |                                                                                                                                                                                                                                     | -           | 10       | Absent |

|                               |                                                                                                                                                                                           |                                                                                                                |             |   |        |
|-------------------------------|-------------------------------------------------------------------------------------------------------------------------------------------------------------------------------------------|----------------------------------------------------------------------------------------------------------------|-------------|---|--------|
|                               | <b>H411</b> Long-term (chronic) aquatic hazard (Category 2).                                                                                                                              |                                                                                                                |             |   |        |
| <b>Potassium ferrocyanide</b> | <b>H412</b> Long-term (chronic) aquatic hazard (Category 3).<br><b>EUH032</b> Contact with acids liberates very toxic gas.                                                                |                                                                                                                | -           | 7 | Absent |
| <b>i-PrOH</b>                 | <b>H225</b> Flammable liquids (Category 2).<br><b>H319</b> Eye irritation (Category 2).<br><b>H336</b> Specific target organ toxicity - single exposure (Category 3), Respiratory system. |                                                                                                                | Recommended | - | 10%    |
| <b>Prussian Blue</b>          | <b>Not a hazardous substance or mixture according to Regulation (EC) No 1272/2008.</b>                                                                                                    | <b>H302</b> Harmful if swallowed<br><b>H312</b> Harmful in contact with skin<br><b>H332</b> Harmful if inhaled |             |   |        |
| <b>Water</b>                  | <b>Not a hazardous substance or mixture according to Regulation (EC) No. 1272/2008</b><br><b>GHS Not Classified</b>                                                                       |                                                                                                                | Recommended |   | 90%    |

### 3. References

- <sup>1</sup> Macagnano, A.; Zampetti, E.; Pistillo, B. R.; Pantalei, S.; Sgreccia, E.; Paolesse, R.; d'Agostino, R. Double layer sensors mimic olfactory perception: A case study. *Thin Solid Films* **2008**, *516*, 7857-7865. DOI: 10.1016/j.tsf.2008.05.025.
- <sup>2</sup> Bearzotti, A.; Macagnano, A.; Papa, P.; Venditti, I. A study of a QCM sensor based on pentacene for the detection of BTX vapors in air. *Sensors and Actuators B: Chemical* **2017**, *240*, 1160-1164. DOI: 10.1016/j.snb.2016.09.097
- <sup>3</sup> Wasilewski, T.; Szulczynski, B.; Kamysz, W.; Gebicki, J.; Namiesnik, J. Evaluation of Three Peptide Immobilization Techniques on a QCM Surface Related to Acetaldehyde Responses in the Gas Phase. *Sensors* **2018**, *18*, No. 3942. DOI: 10.3390/s18113942
- <sup>4</sup> GHS Classification- United Nations Economic Commission for Europe, Globally Harmonized System of Classification and Labelling of Chemicals (GHS): [http://www.unece.org/trans/danger/publi/ghs/ghs\\_welcome\\_e.html](http://www.unece.org/trans/danger/publi/ghs/ghs_welcome_e.html)
- <sup>5</sup> Denis Prat et. al., *Green Chem.*, 2016, *18*, 288-296. DOI: 10.1039/C5GC01008DJ
- <sup>6</sup> K. Hajizadeh, H.B. Halsall and W.R. Heineman, Immobilization of lactate oxidase in a poly(vinylalcohol) matrix on platinised graphite electrodes by chemical cross-linking with isocyanate, *Talanta*, 1991, **38**, 37-47.
- <sup>7</sup> N. Sato and H. Okuma, Amperometric simultaneous sensing system for D-glucose and L-lactate based on enzyme-modified bilayer electrodes, *Anal.Chim.Acta*, 2006, **565**, 250-254.
- <sup>8</sup> J. M. Goran, J. L. Lyon and K. J. Stevenson, Amperometric Detection of L-Lactate Using Nitrogen-Doped Carbon Nanotubes Modified with Lactate Oxidase, *Anal. Chem.*, 2011, **83**, 8123-8129.
- <sup>9</sup> M. R. Romero, F. Ahumada, F. Garay and A. M. Baruzzi, Amperometric biosensor for direct blood lactate detection, *Anal.Chem.*, 2010, **82**, 5568-5572.
- <sup>10</sup> T. Shimomura, T. Sumiya, M. Ono, T. Ito and T. Hanaoka, Amperometric L-lactate biosensor based on screen-printed carbon electrode containing cobalt phthalocyanine, coated with lactate oxidase-mesoporous silica conjugate layer, *Anal.Chim.Acta*, 2012, **714**, 114-120.
